# Supplementary material for: The degradation of phenol via in situ H2O2 production over supported Pd-based catalysts
Source: Royal Society of Chemistry journal article supplement (doi:10.1039/d1cy01897c), 2021-01-01
Supplement: d1cy01897c1.pdf [file d1cy01897c1.pdf]

## Supporting Information

### The Degradation of Phenol via in-situ H<sub>2</sub>O<sub>2</sub> Production Over Supported Pd-based Catalysts.

Alba Santos<sup>at</sup>, Richard J. Lewis<sup>at\*</sup>, David J. Morgan<sup>a,b</sup>, Thomas E. Davies<sup>a</sup>, Euan Hampton<sup>c</sup>, Paul Gaskin<sup>c</sup> and Graham J. Hutchings<sup>a\*</sup>

<sup>a</sup>Max Planck centre for Fundamental Heterogeneous Catalysis (FUNCAT), Cardiff Catalysis Institute, School of Chemistry, Cardiff University, Main Building, Park Place, Cardiff, CF10 3AT, United Kingdom.

<sup>b</sup>HarwellXPS, Research Complex at Harwell (RCaH), Didcot, OX11 OFA, United Kingdom.

<sup>c</sup>Dŵr Cymru Welsh Water, Pentwyn Road, Nelson, Treharris, CF46 6LY, United Kingdom.

<sup>†</sup> These authors contributed equally to this work.

\*Hutch@Cardiff.ac.uk, LewisR27@Cardiff.ac.uk

**Table S.1.** Synthesis details of the precursors used in the preparation of mono- and bi-metallic 1% PdX/TiO<sub>2</sub> catalysts.

| Catalyst                       | Pd precursor      | Volume of Pd precursor / mL (concentration 6.96 mgmL <sup>-1</sup> ) | Metal X precursor                     | Volume of metal X precursor / mL (concentration mgmL <sup>-1</sup> ) |
|--------------------------------|-------------------|----------------------------------------------------------------------|---------------------------------------|----------------------------------------------------------------------|
| 1%Pd/TiO <sub>2</sub>          | PdCl <sub>2</sub> | 1.437                                                                | -                                     | -                                                                    |
| 0.5%Pd-0.5%Au/TiO <sub>2</sub> | PdCl <sub>2</sub> | 0.718                                                                | HAuCl <sub>4</sub> .3H <sub>2</sub> O | 0.408 (12.25)                                                        |
| 0.5%Pd-0.5%Cu/TiO <sub>2</sub> | PdCl <sub>2</sub> | 0.718                                                                | CuCl <sub>2</sub>                     | 0.981 (5.10)                                                         |
| 0.5%Pd-0.5%Co/TiO <sub>2</sub> | PdCl <sub>2</sub> | 0.718                                                                | CoCl <sub>2</sub> .6H <sub>2</sub> O  | 2.119 (2.36)                                                         |
| 0.5%Pd-0.5%Fe/TiO <sub>2</sub> | PdCl <sub>2</sub> | 0.718                                                                | FeCl <sub>3</sub> .6H <sub>2</sub> O  | 1.046 (4.78)                                                         |

**Note :** All catalysts were exposed to a reductive heat treatment (5%H<sub>2</sub>/Ar, 400 °C, 4 h, 10 °C min<sup>-1</sup>) prior to use.

**Table S.2.** Determination of actual catalyst loading, as determined by MP-AES analysis of aqua-regia digested catalysts.

| Theoretical Catalyst Loading / wt. % | Actual Catalyst Loading / wt. %  |
|--------------------------------------|----------------------------------|
| 1%Pd/TiO <sub>2</sub>                | 0.91%Pd/TiO <sub>2</sub>         |
| 0.75%Pd-0.25%Fe/TiO <sub>2</sub>     | 0.73%Pd-0.27%Fe/TiO <sub>2</sub> |
| 0.5%Pd-0.5%Fe/TiO <sub>2</sub>       | 0.42%Pd-0.58%Fe/TiO <sub>2</sub> |
| 0.25%Pd-0.75%Fe/TiO <sub>2</sub>     | 0.24%Pd-0.76%Fe/TiO <sub>2</sub> |
| 1%Fe/TiO <sub>2</sub>                | 0.81%Fe/TiO <sub>2</sub>         |

**Table S.3.** Surface area of as-prepared TiO<sub>2</sub> supported catalysts.

| Catalyst                         | Surface area */ m <sup>2</sup> g <sup>-1</sup> |
|----------------------------------|------------------------------------------------|
| TiO <sub>2</sub> **              | 61                                             |
| 1%Pd/TiO <sub>2</sub>            | 56                                             |
| 0.75%Pd-0.25%Fe/TiO <sub>2</sub> | 53                                             |
| 0.5%Pd-0.5%Fe/TiO <sub>2</sub>   | 54                                             |
| 0.25%Pd-0.75%Fe/TiO <sub>2</sub> | 56                                             |
| 1%Fe/TiO <sub>2</sub>            | 59                                             |

\* Surface area determined from nitrogen adsorption measurements using the BET equation.

\*\*Support material used as received, with no modification prior to metal immobilisation.

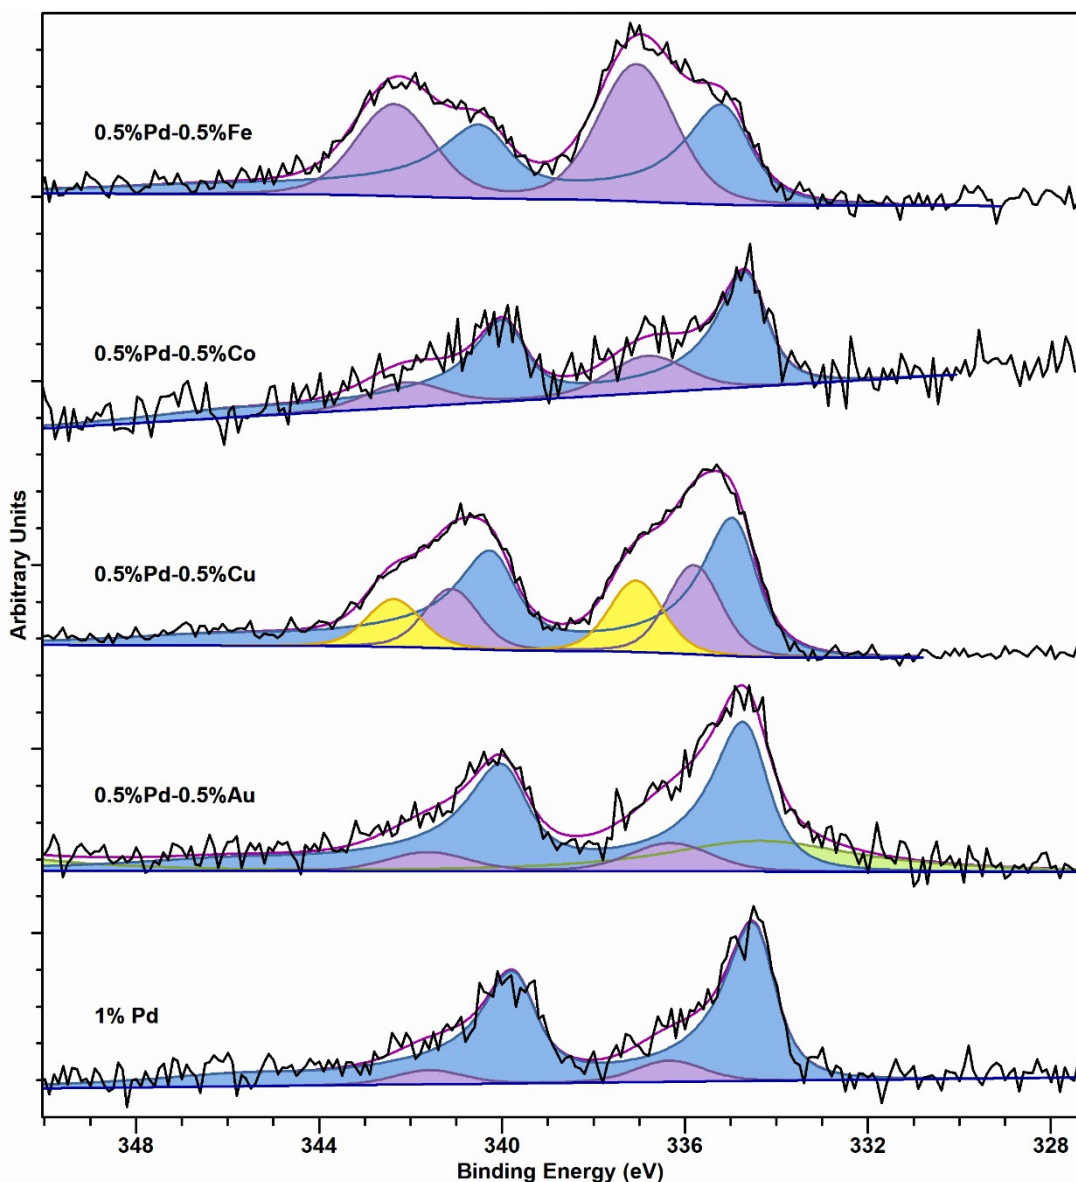

**Figure S.1.** Pd(3d)/Au(4d) spectra region for as-prepared 1%PdX/TiO<sub>2</sub> catalysts (X = Au, Cu, Co and Fe). **Key:** Metallic Pd (*Blue*), Pd(II) Oxide (*Purple*), Pd(II) Chloride (*Yellow*) and Metallic Au (*Green*). **Note:** all catalysts exposed to a reductive heat treatment prior to use (5%H<sub>2</sub>/Ar, 500 °C, 4 h, 10 °C min<sup>-1</sup>).

**Table S.4.** The choice of oxidant on the catalytic activity of 0.5%Pd-0.5%Fe/TiO<sub>2</sub> towards the degradation of phenol.

| Oxidant                                          | Phenol Conversion / % |
|--------------------------------------------------|-----------------------|
| H <sub>2</sub> + O <sub>2</sub>                  | 39.0                  |
| H <sub>2</sub> (N <sub>2</sub> )                 | 6.0                   |
| O <sub>2</sub> (N <sub>2</sub> )                 | 4.0                   |
| H <sub>2</sub> O <sub>2</sub> (N <sub>2</sub> )* | 0.2                   |

**Phenol degradation reaction conditions:** Catalyst (0.01 g), phenol (1000 ppm, 8.5 g), 5% H<sub>2</sub> / CO<sub>2</sub> (420 psi), 25% O<sub>2</sub> / CO<sub>2</sub> (160 psi), 2 h, 30 °C, 2 h.\*Concentration of H<sub>2</sub>O<sub>2</sub> (4.5 mmol) used is comparable to that produced if all H<sub>2</sub> in a standard phenol oxidation reaction is converted to H<sub>2</sub>O<sub>2</sub>. In the case of the O<sub>2</sub> and H<sub>2</sub> only experiments N<sub>2</sub> in parentheses is indicative of gaseous diluent used to maintain total pressure at 580 psi. Similarly, N<sub>2</sub> (580 psi) was used in the experiment, which used commercial H<sub>2</sub>O<sub>2</sub> as the oxidant.

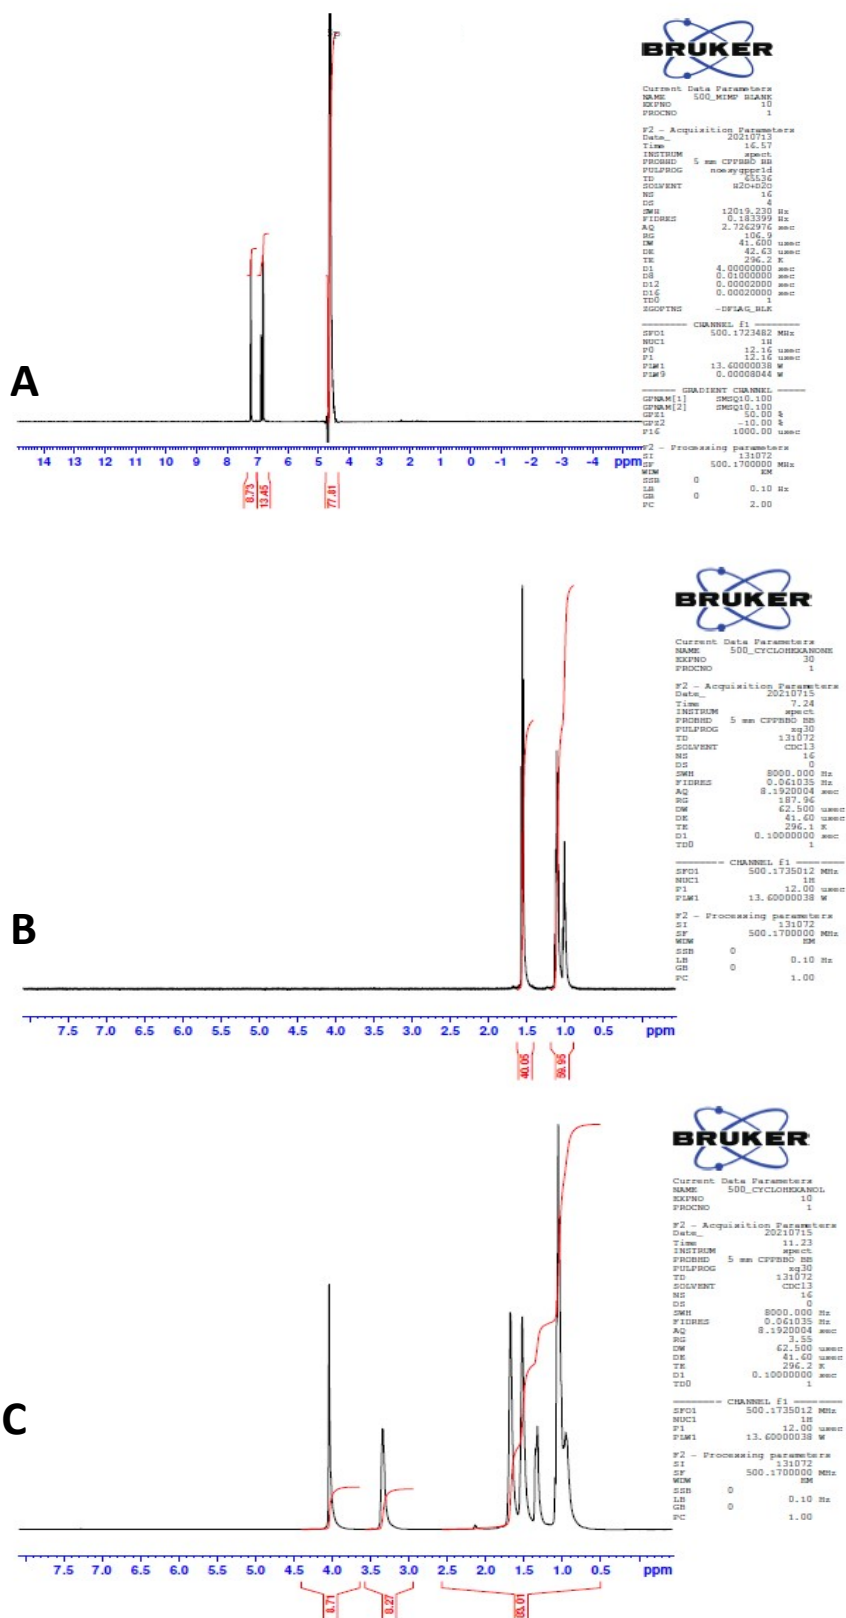

**Figure S.2.**  $^1\text{H}$  NMR spectra of demonstrating the lack of phenol hydrogenation during the oxidative degradation of phenol via in-situ  $\text{H}_2\text{O}_2$  production. **(A)** post-hydrogenation reaction, **(B)** cyclohexanol and **(C)** cyclohexanone. **Phenol hydrogenation reaction conditions:** Catalyst (0.01 g), phenol (1000 ppm, 8.5 g), 5%  $\text{H}_2 / \text{CO}_2$  (420 psi),  $\text{N}_2$  (160 psi), 2 h, 30  $^\circ\text{C}$ , 2 h.

## Supplementary Note.

With numerous studies reporting the ability of Pd nanoparticles to catalyse the reduction of phenol to cyclohexanol and cyclohexanone (collectively KA oil)<sup>1</sup> we were motivated to rule out this route to phenol conversion. The <sup>1</sup>HNMR spectra of a post-hydrogenation phenol reaction (Figure S.2.A), where the reaction was carried out under identical conditions to those used for the degradation of phenol via in-situ H<sub>2</sub>O<sub>2</sub> production but in the absence of O<sub>2</sub> indicates that under these reaction conditions the formation of KA oil is not a route to phenol conversion, with no chemical shifts attributed to either phenol hydrogenation product observed. The <sup>1</sup>HNMR spectra of the individual products of phenol hydrogenation (cyclohexanol and cyclohexanone) are reported in Figure S.2.B and Figure S.2.C respectively for reference.

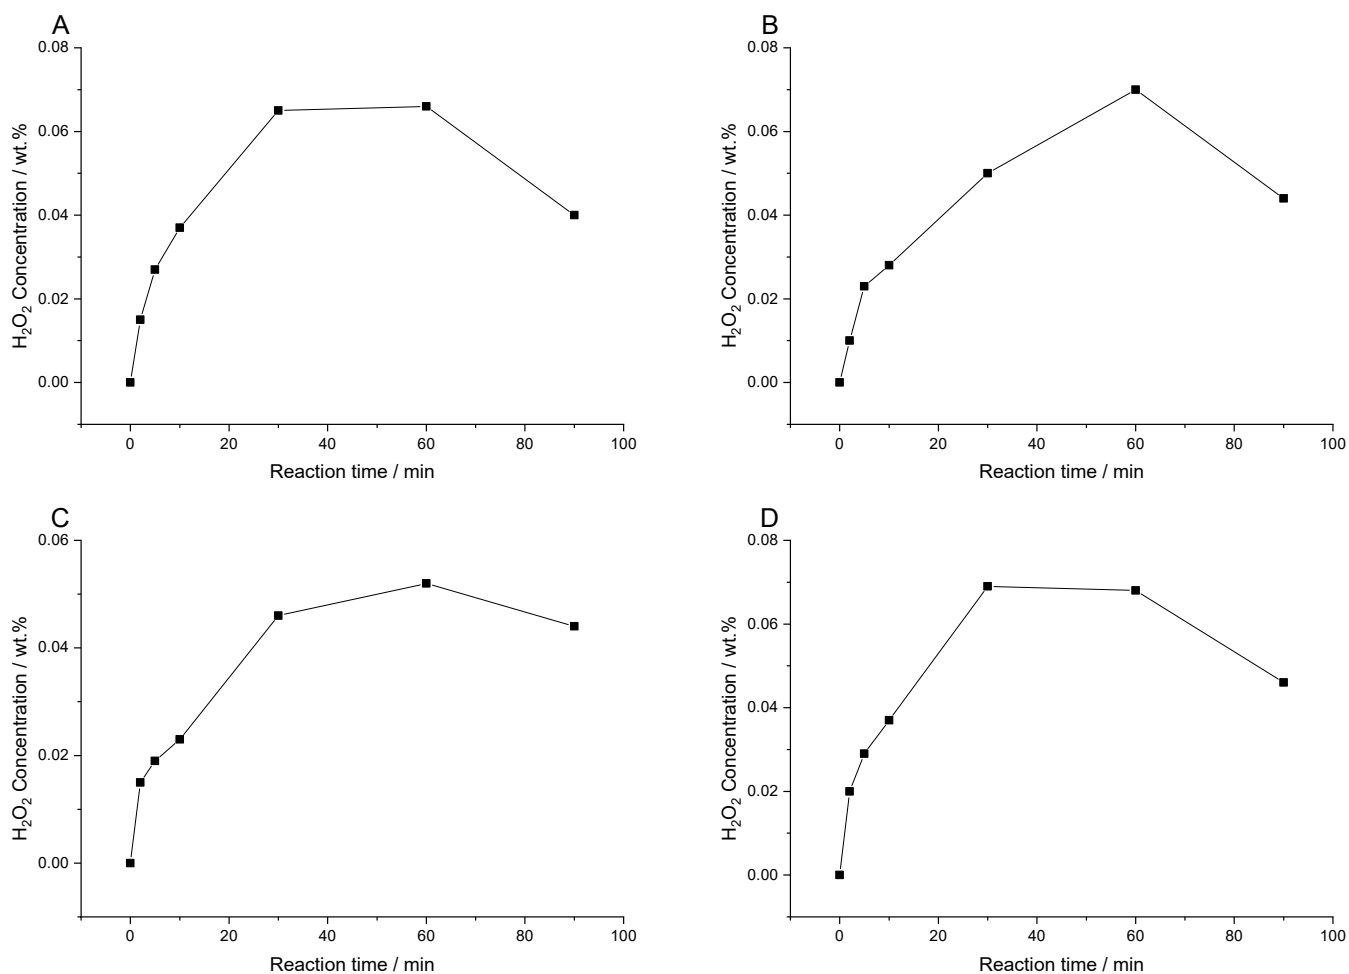

**Figure S.3.** Catalytic activity of 1%PdFe/TiO<sub>2</sub> catalysts towards the direct synthesis of H<sub>2</sub>O<sub>2</sub>, as a function of Pd: Fe ratio, under conditions utilised for the in-situ oxidative degradation of phenol. **H<sub>2</sub>O<sub>2</sub> direct synthesis reaction conditions:** H<sub>2</sub>O (8.5 g) catalyst (0.01 g), 5%H<sub>2</sub>/CO<sub>2</sub> (420 psi), 25% O<sub>2</sub>/CO<sub>2</sub> (160 psi), 30 °C, 1200 rpm. **H<sub>2</sub>O<sub>2</sub> degradation reaction conditions:** H<sub>2</sub>O (7.82 g) H<sub>2</sub>O<sub>2</sub> (50 wt.%, 0.68 g), catalyst (0.01 g), 5%H<sub>2</sub>/CO<sub>2</sub> (420 psi), 25% O<sub>2</sub>/CO<sub>2</sub> (160 psi), 30 °C, 1200 rpm.

**Table S.5.** Catalytic activity towards the direct synthesis and subsequent degradation of H<sub>2</sub>O<sub>2</sub>, as a function of Pd: Fe ratio, under conditions utilised for the in-situ oxidative degradation of phenol.

| Catalyst                         | H <sub>2</sub> O <sub>2</sub> concentration /<br>wt. % | Degradation /<br>% |
|----------------------------------|--------------------------------------------------------|--------------------|
| 1%Pd/TiO <sub>2</sub>            | 0.065                                                  | 84.4               |
| 0.75%Pd-0.25%Fe/TiO <sub>2</sub> | 0.050                                                  | 43.2               |
| 0.5%Pd-0.5%Fe/TiO <sub>2</sub>   | 0.046                                                  | 32.8               |
| 0.25%Pd-0.75%Fe/TiO <sub>2</sub> | 0.069                                                  | 12.2               |
| 1%Fe/TiO <sub>2</sub>            | 0.000                                                  | 0.01               |

**H<sub>2</sub>O<sub>2</sub> direct synthesis reaction conditions:** H<sub>2</sub>O (8.5 g) catalyst (0.01 g), 5%H<sub>2</sub>/CO<sub>2</sub> (420 psi), 25% O<sub>2</sub>/CO<sub>2</sub> (160 psi), 30 °C, 0.5 h, 1200 rpm. **H<sub>2</sub>O<sub>2</sub> degradation reaction conditions:** H<sub>2</sub>O (7.82 g) H<sub>2</sub>O<sub>2</sub> (50 wt.%, 0.68 g), catalyst (0.01 g), 5%H<sub>2</sub>/CO<sub>2</sub> (420 psi), 25% O<sub>2</sub>/CO<sub>2</sub> (160 psi), 30 °C, 0.5 h, 1200 rpm.

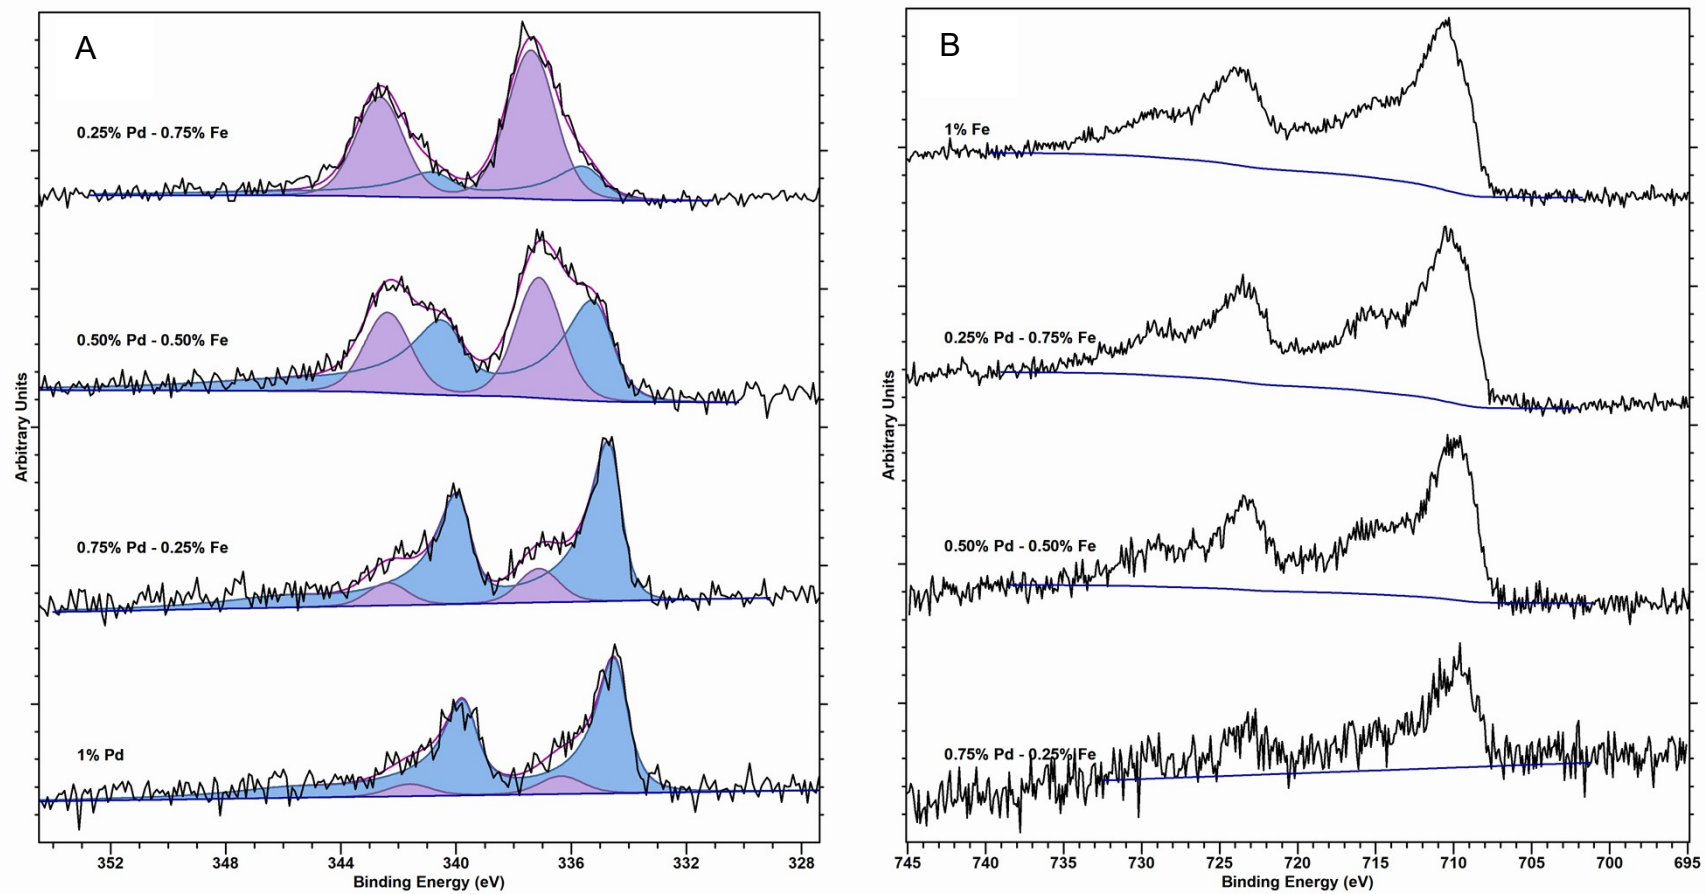

**Figure S.4.** XPS spectra of **(A)** Pd(3d) and **(B)** Fe (2p) regions for the as-prepared 1%PdFe/TiO<sub>2</sub> catalysts. **Key:** Metallic Pd (*Blue*) and Pd(II) Oxide (*Purple*). **Note:** all catalysts exposed to a reductive heat treatment prior to use (5%H<sub>2</sub>/Ar, 500 °C, 4 h, 10 °C min<sup>-1</sup>).

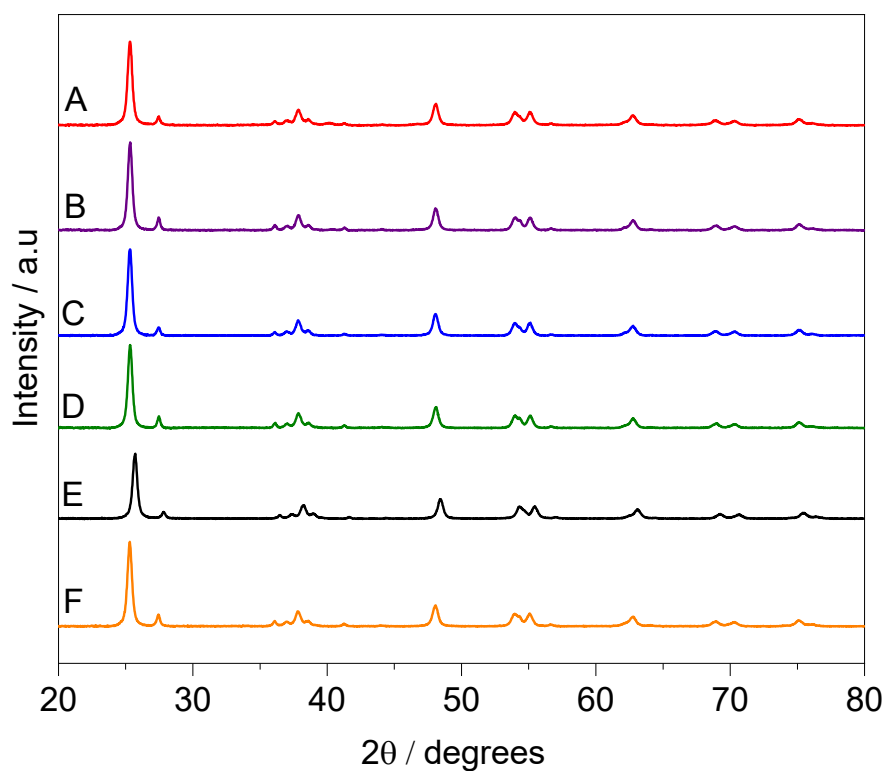

**Figure S.5.** X-ray diffractograms of 1%PdFe/TiO<sub>2</sub> catalysts, prepared via an excess chloride methodology. **(A)** 1%Pd/TiO<sub>2</sub>, **(B)** 0.75%Pd-0.25%Fe/TiO<sub>2</sub>, **(C)** 0.5%Pd-0.5%Fe/TiO<sub>2</sub>, **(D)** 0.25%Pd-0.75%Fe/TiO<sub>2</sub>, **(E)** 1%Fe/TiO<sub>2</sub> and **(F)** TiO<sub>2</sub>. **Note:** all catalysts exposed to a reductive heat treatment prior to use (5%H<sub>2</sub>/Ar, 500 °C, 4 h, 10 °C min<sup>-1</sup>).



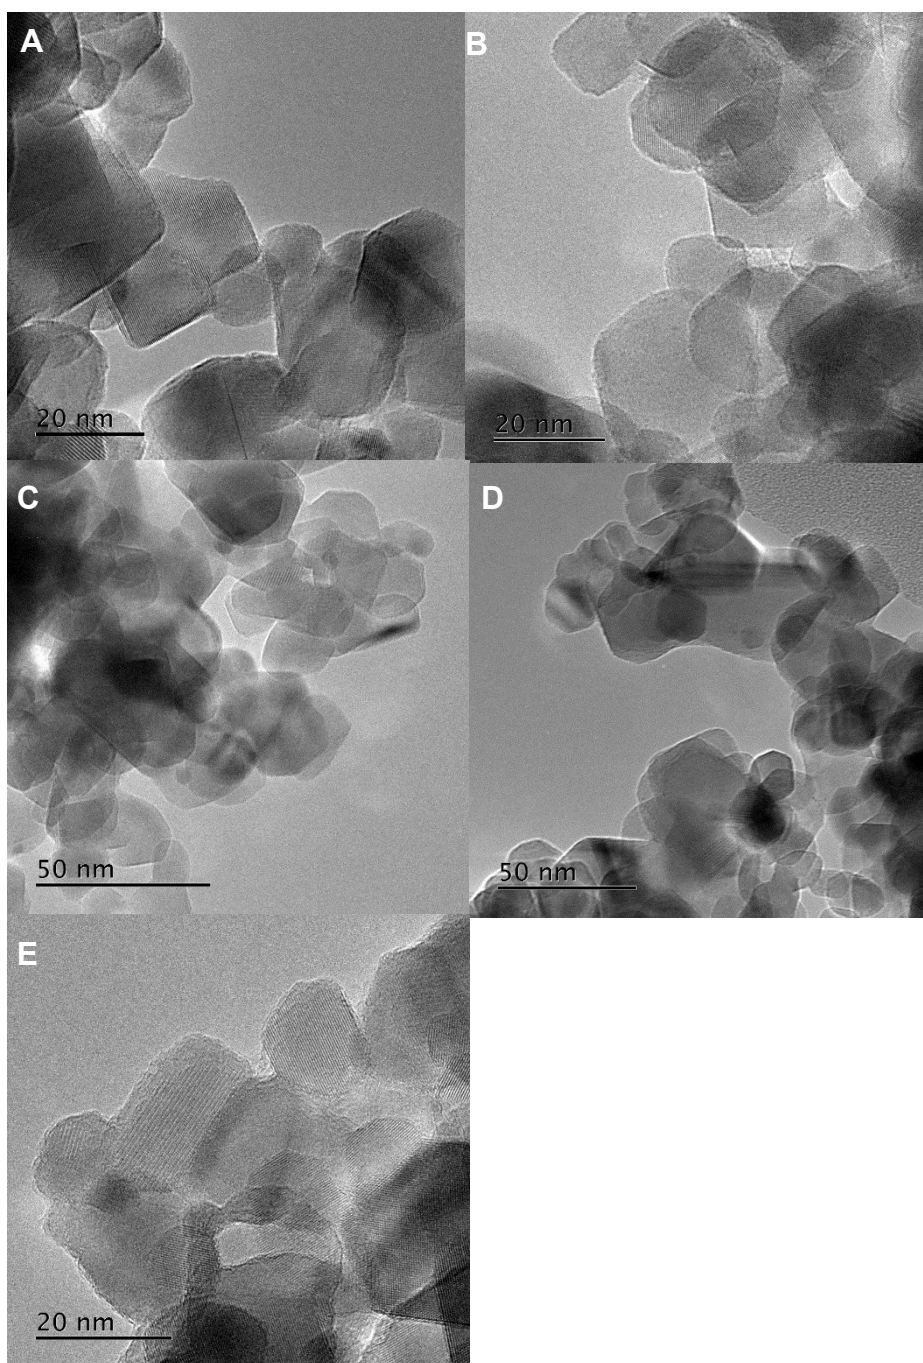

**Figure S. 6** Transmission electron microscopy of the 1%PdFe/TiO<sub>2</sub> catalysts prepared by an excess chloride methodology. **(A)** 1%Pd/TiO<sub>2</sub>, **(B)** 0.75%Pd-0.25%Fe/TiO<sub>2</sub>, **(C)** 0.5%Pd-0.5%Fe/TiO<sub>2</sub>, **(D)** 0.25%Pd-0.75%Fe/TiO<sub>2</sub> and **(E)** 1%Fe/TiO<sub>2</sub> **Note:** all catalysts exposed to a reductive heat treatment prior to use (5%H<sub>2</sub>/Ar, 500 °C, 4 h, 10 °C min<sup>-1</sup>).

**Table S.6.** MP-AES analysis of post reaction solutions of the degradation of phenol utilising 1% PdFe/TiO<sub>2</sub> as a function of Pd: Fe ratio.

| Catalyst                         | Phenol Conversion / % | Selectivity towards phenolic derivatives / % | Selectivity towards organic acids / % | Fe leaching / ppm (%) | Pd leaching / ppm (%) |
|----------------------------------|-----------------------|----------------------------------------------|---------------------------------------|-----------------------|-----------------------|
| 1%Pd/TiO <sub>2</sub>            | 11.0                  | 11.0                                         | 89.0                                  | -                     | 0.0 (0)               |
| 0.75%Pd-0.25%Fe/TiO <sub>2</sub> | 32.0                  | 30.0                                         | 70.0                                  | 1.35 (46)             | 0.17 (2)              |
| 0.5%Pd-0.5%Fe/TiO <sub>2</sub>   | 39.0                  | 31.0                                         | 69.0                                  | 2.44 (42)             | 0.08 (1)              |
| 0.25%Pd-0.75%Fe/TiO <sub>2</sub> | 46.0                  | 29.0                                         | 71.0                                  | 3.22 (36)             | 0.05 (1)              |
| 1%Fe/TiO <sub>2</sub>            | 3.0                   | 0.0                                          | 100.0                                 | 0.0 (0)               | -                     |

**Phenol degradation reaction conditions:** Catalyst (0.01 g), phenol (1000 ppm, 8.5 g), 5% H<sub>2</sub> / CO<sub>2</sub> (420 psi), 25% O<sub>2</sub> / CO<sub>2</sub> (160 psi), 2 h, 30 °C, 2 h. **Note:** Values in parentheses indicate the extent of Fe and Pd leaching as a percentage of metal loading.

**Table S.7.** Pd and Fe leaching of 1%PdFe/TiO<sub>2</sub> catalysts exposed to phenol oxidation reaction conditions in the absence of phenol or under conditions where phenol oxidation through H<sub>2</sub>O<sub>2</sub> generation is not possible.

| Catalyst                                 | Fe leaching / ppm (%) | Pd leaching / ppm (%) |
|------------------------------------------|-----------------------|-----------------------|
| 1%Pd/TiO <sub>2</sub>                    | -                     | 0.0 (0)               |
| 0.75%Pd-0.25%Fe/TiO <sub>2</sub>         | 0.0 (0)               | 0.0 (0)               |
| 0.5%Pd-0.5%Fe/TiO <sub>2</sub>           | 0.0 (0)               | 0.0 (0)               |
| 0.25%Pd-0.75%Fe/TiO <sub>2</sub>         | 0.0 (0)               | 0.0 (0)               |
| 1%Fe/TiO <sub>2</sub>                    | 0.0 (0)               | -                     |
| 0.5%Pd-0.5%Fe/TiO <sub>2</sub> (phenol)* | 0.0 (0)               | 0.0 (0)               |

**Phenol degradation reaction conditions:** Catalyst (0.01 g), H<sub>2</sub>O (1000 ppm, 8.5 g), 5% H<sub>2</sub> / CO<sub>2</sub> (420 psi), 25% O<sub>2</sub> / CO<sub>2</sub> (160 psi), 2 h, 30 °C, 2 h.\*Conditions as outlined above, in the presence of phenol (1000 ppm) under N<sub>2</sub> atmosphere (580 psi). **Note:** Values in parentheses indicate the extent of Fe and Pd leaching as a percentage of metal loading.

## References.

1. H. Zhou, B. Han, T. Liu, X. Zhong, G. Zhuang and J. Wang, *Green Chem.*, 2017, **19**, 3585-3594.
